# Supplementary material for: Germinated chickpea protein ficin hydrolysate and its peptides inhibited glucose uptake and affected the bitter receptor signaling pathway in vitro
Source: Royal Society of Chemistry journal article supplement (doi:10.1039/d3fo01408h), 2023-01-01
Supplement: d3fo01408h1.pdf [file d3fo01408h1.pdf]

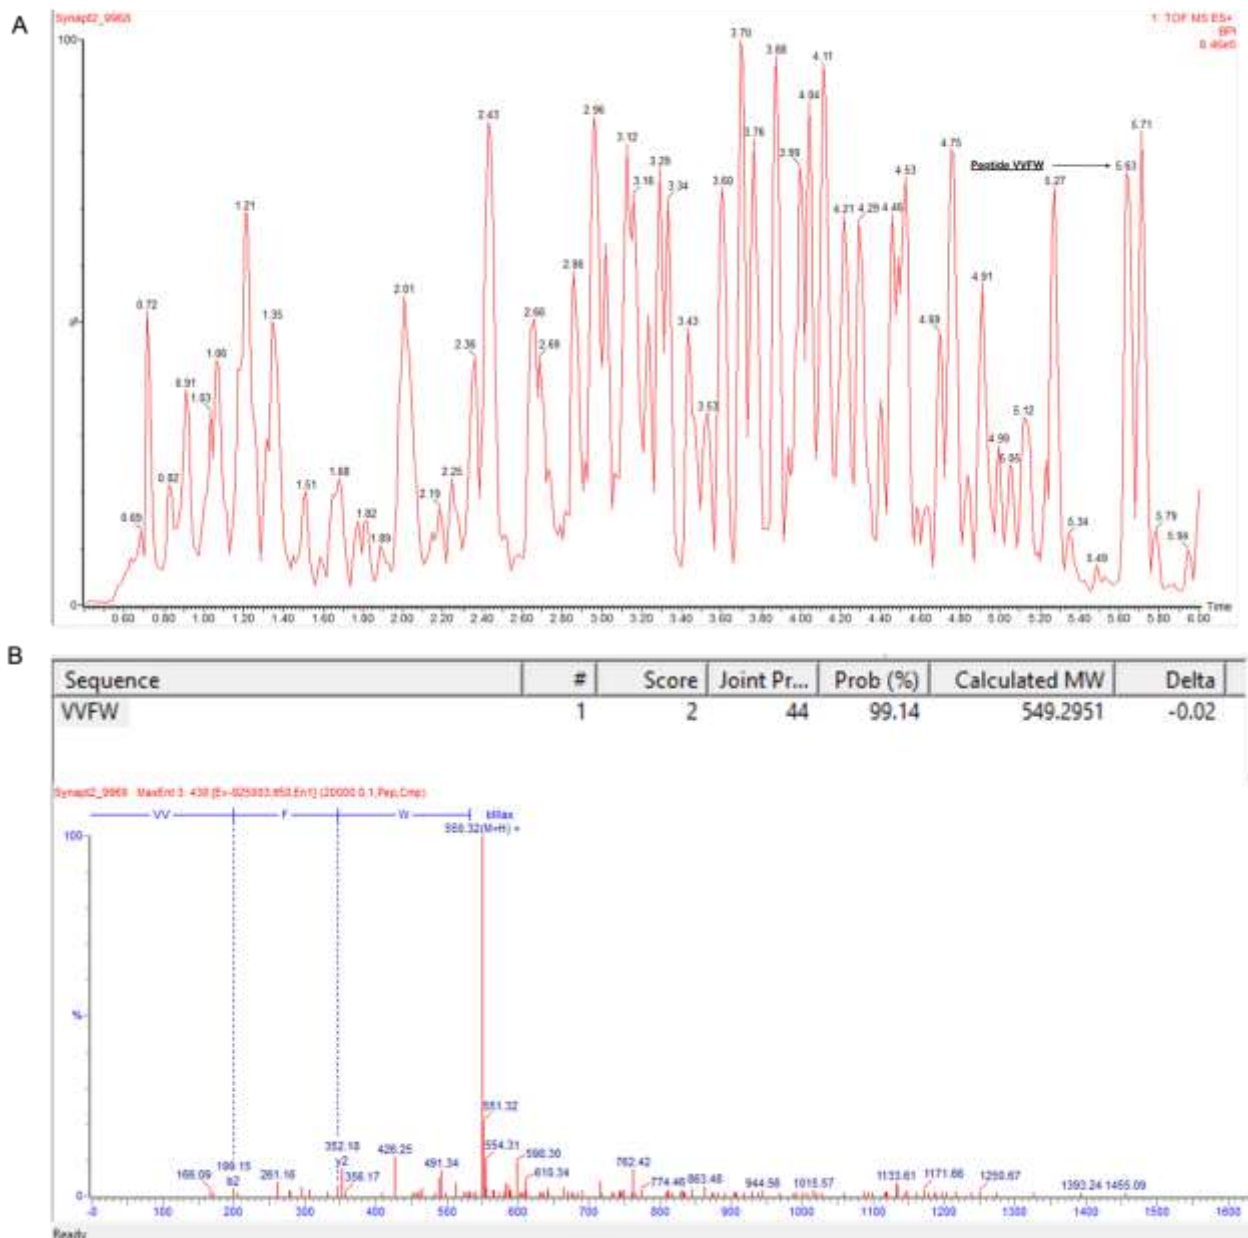

Supplementary Figure 1. LC-ESI-MS/MS technique used for peptide sequencing, specifically for peptide Valine-Valine-Phenylalanine-Tryptophan (VVFW). A. Mass spectrum of germinated chickpea protein hydrolysate; B. Final results of peptide sequencing.

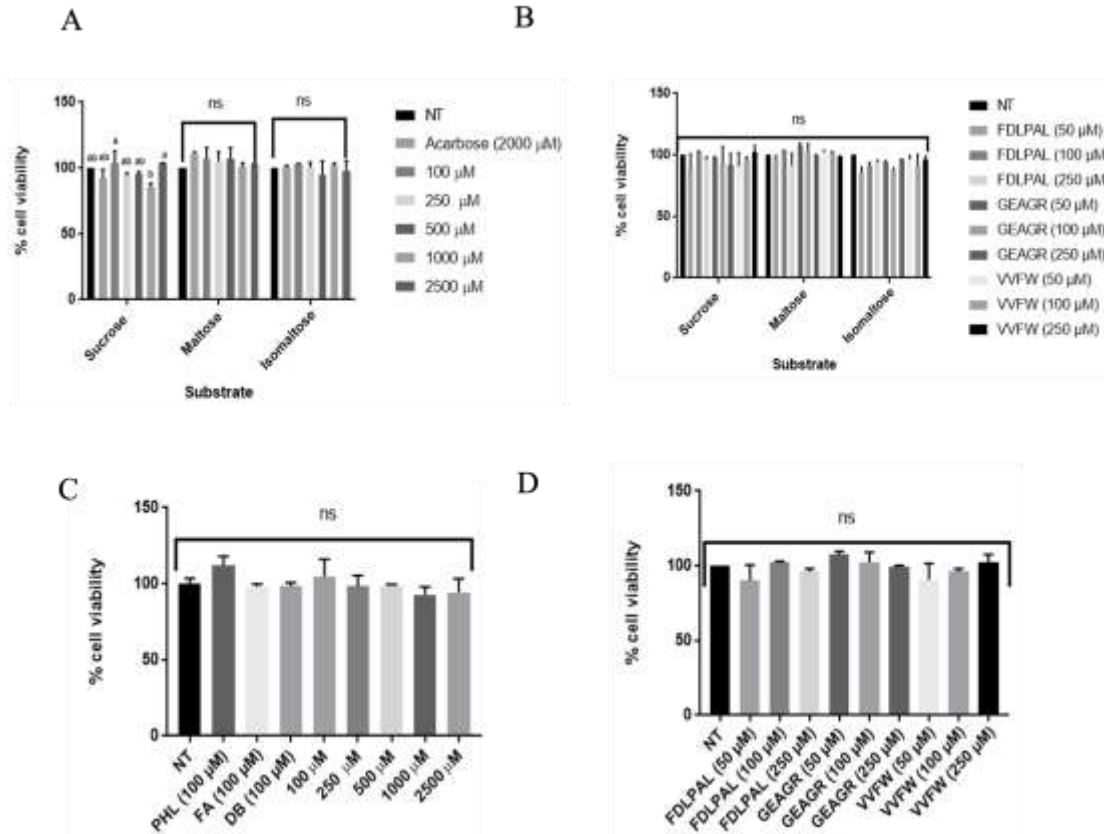

Supplementary Figure 2. **A.** Cell viability of Caco-2 cells treated with germinated chickpea protein hydrolysate or positive control Acarbose (2 mM) and further stimulated with sucrose, maltose or isomaltose. **B.** Cell viability of Caco-2 cells treated with pure peptides FDLPAL, GEAGR, or VVFW and further stimulated with sucrose, maltose or isomaltose. **C.** Cell viability of Caco-2 cells treated with germinated chickpea protein hydrolysate or positive controls phloretin (PHL), flufenamic acid (FA) and denatonium benzoate (DB) and further stimulated with glucose. **D.** Cell viability of Caco-2 cells treated with pure peptides FDLPAL, GEAGR, or VVFW and further stimulated with glucose. Letters indicate significant differences ( $p < 0.05$ ). NT: Non-treated cells; NS: Non-significant ( $p > 0.05$ ). Bars indicate mean value obtained and error bars show standard deviation.

Supplementary Figure 3. Proposed mechanism of action.

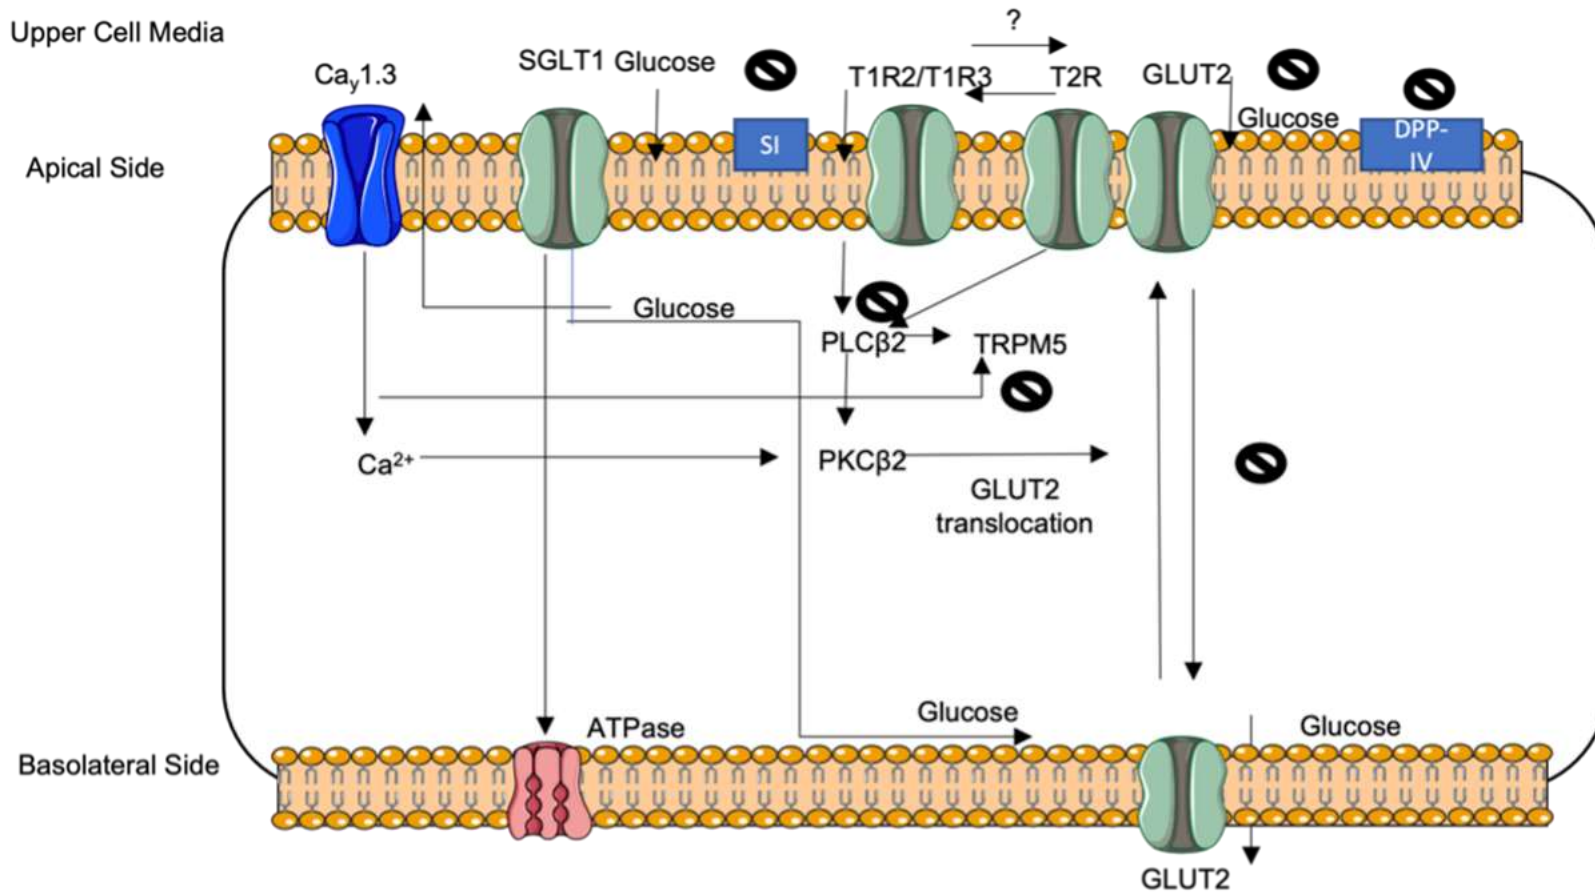

Supplementary Table 1. Physicochemical, bioactive and bitterness properties of peptides identified in germinated chickpea protein hydrolysate from metabolic sources.

| Peptide | Length | Mass (g/mol) | pI    | Net charge | Hydrophobicity (kcal/mol) | Bioactive Properties                                 | Bioactive peptide fragment(s) | Bitter fragments | Predicted activation of bitter receptors                                                                    |
|---------|--------|--------------|-------|------------|---------------------------|------------------------------------------------------|-------------------------------|------------------|-------------------------------------------------------------------------------------------------------------|
| STSA    | 4      | 364.16       | 5.51  | 0          | 9.57                      | ACE-inhibition                                       | ST                            | N/A              | hT2R1                                                                                                       |
|         |        |              |       |            |                           | DPP-IV inhibition                                    | TS                            |                  |                                                                                                             |
| VTPGGAR | 7      | 656.36       | 11.10 | 1          | 12.44                     | ACE-inhibition                                       | GA, GG, PG, AR, TP            | R, P, PGG, V, PG | hT2R1, hT2R14, hT2R16, hT2R47, hT2R41, hT2R10, hT2R43, hT2R46, hT2R7, hT2R44, hT2R38, hT2R39, hT2R40, hT2R4 |
|         |        |              |       |            |                           | DPP-IV inhibition                                    | TP, GA, GG, PG, VT            |                  |                                                                                                             |
|         |        |              |       |            |                           | Peptide regulating stomach mucosal membrane activity | PG                            |                  |                                                                                                             |
|         |        |              |       |            |                           | Antithrombotic peptide                               | PG                            |                  |                                                                                                             |
| TPVG    | 4      | 372.20       | 5.49  | 0          | 8.98                      | ACE-inhibition                                       | VG, TP                        | P, V, VG         | hT2R1, hT2R16, hT2R10, hT2R14, hT2R46, hT2R41, hT2R43                                                       |
|         |        |              |       |            |                           | DPP-IV inhibition                                    | TP, PV, VG                    |                  |                                                                                                             |
| DAGLG   | 5      | 431.20       | 3.13  | -1         | 13.09                     | ACE-inhibition                                       | GL, AG, DA, LG                |                  | hT2R14, hT2R1, hT2R16,                                                                                      |

|            |    |        |       |   |       |                                                      |                                              |                                                |                                                                                                             |
|------------|----|--------|-------|---|-------|------------------------------------------------------|----------------------------------------------|------------------------------------------------|-------------------------------------------------------------------------------------------------------------|
|            |    |        |       |   |       | DPP-IV inhibition                                    | GL, AG, DA, AG, GE                           | LG, GL, L, GLG, DA                             | hT2R41, hT2R39                                                                                              |
|            |    |        |       |   |       | a-Glucosidase inhibition                             | EA                                           |                                                |                                                                                                             |
| GKGSPPGGVA | 11 | 882.45 | 10.16 | 1 | 17.23 | ACE-inhibition                                       | GP, KG, GS, GV, GK, GG, SG, PG, GPP, PP, SGP | P, V, K, PP, GP, PPG, PGG, GV, GGV, KG, VA, PG | hT2R7, hT2R14, hT2R47, hT2R43, hT2R40, hT2R16, hT2R44, hT2R46, hT2R1, hT2R38, hT2R39, hT2R41, hT2R10, hT2R4 |
|            |    |        |       |   |       | Antithrombotic peptide                               | GP, PG                                       |                                                |                                                                                                             |
|            |    |        |       |   |       | Peptide regulating stomach mucosal membrane activity | GP, PG                                       |                                                |                                                                                                             |
|            |    |        |       |   |       | Antioxidative peptide                                | GPP                                          |                                                |                                                                                                             |
|            |    |        |       |   |       | DPP-IV inhibition                                    | GP, PP, VA, PPG, GG, GV, KG, PG              |                                                |                                                                                                             |
|            |    |        |       |   |       | a-Glucosidase inhibition                             | PP                                           |                                                |                                                                                                             |
|            |    |        |       |   |       | HMG-CoA reductase inhibitor                          | GGV                                          |                                                |                                                                                                             |
|            |    |        |       |   |       | VPGGSR                                               | 7                                            |                                                |                                                                                                             |

|           |    |        |       |   |       |                                                      |                    |                     |                                                                                                             |
|-----------|----|--------|-------|---|-------|------------------------------------------------------|--------------------|---------------------|-------------------------------------------------------------------------------------------------------------|
|           |    |        |       |   |       | DPP-IV inhibition                                    | VP, GG, PG         |                     | hT2R41, hT2R43, hT2R10, hT2R46, hT2R47, hT2R7, hT2R39, hT2R38, hT2R44, hT2R40                               |
|           |    |        |       |   |       | Antithrombotic                                       | PG                 |                     |                                                                                                             |
|           |    |        |       |   |       | Peptide regulating stomach mucosal membrane activity | PG                 |                     |                                                                                                             |
| GKSPVGGGK | 10 | 882.49 | 10.65 | 2 | 18.38 | ACE-inhibition                                       | VG, GK, GG, PP     | P, V, K, PP, VG     | hT2R7, hT2R14, hT2R47, hT2R1, hT2R16, hT2R40, hT2R43, hT2R38, hT2R46, hT2R39, hT2R41, hT2R44, hT2R10, hT2R4 |
|           |    |        |       |   |       | DPP-IV inhibition                                    | SP, GG, KS, PV, VG |                     |                                                                                                             |
|           |    |        |       |   |       | $\alpha$ -Glucosidase inhibition                     | PP                 |                     |                                                                                                             |
| TPPVGGGGR | 9  | 796.42 | 10.79 | 1 | 14.38 | ACE-inhibition                                       | VG, GR, GG, PP, TP | R, P, V, PP, VG, GR | hT2R7, hT2R14, hT2R47, hT2R43, hT2R16, hT2R46, hT2R40, hT2R1, hT2R44, hT2R38, hT2R39, hT2R10, hT2R41, hT2R4 |
|           |    |        |       |   |       | DPP-IV inhibition                                    | PP, TP, GG, PV, VG |                     |                                                                                                             |
|           |    |        |       |   |       | $\alpha$ -Glucosidase inhibition                     | PP                 |                     |                                                                                                             |

|           |   |        |       |   |       |                                                                     |                                   |                                |                                                                                                                                           |
|-----------|---|--------|-------|---|-------|---------------------------------------------------------------------|-----------------------------------|--------------------------------|-------------------------------------------------------------------------------------------------------------------------------------------|
| SPLAPG    | 6 | 540.29 | 5.51  | 0 | 9.04  | ACE-inhibition                                                      | PL, LAP,<br>AP, LA, PG            | P, L, PL,<br>LA, PG            | hT2R1, hT2R14,<br>hT2R16,<br>hT2R43, hT2R7,<br>hT2R41,<br>hT2R40,<br>hT2R10,<br>hT2R46,<br>hT2R47,<br>hT2R39,<br>hT2R44,<br>hT2R38        |
|           |   |        |       |   |       | DPP-IV<br>inhibition                                                | LA, AP,<br>APG, SP,<br>PL, PG     |                                |                                                                                                                                           |
|           |   |        |       |   |       | Antithrombotic                                                      | PG                                |                                |                                                                                                                                           |
|           |   |        |       |   |       | Peptide<br>regulating<br>stomach<br>mucosal<br>membrane<br>activity | PG                                |                                |                                                                                                                                           |
| LSPAGGK   | 7 | 628.35 | 10.14 | 1 | 12.85 | DPP-IV<br>inhibition                                                | PA, SP, AG,<br>GG                 | P, L, K,<br>PA                 | hT2R1, hT2R16,<br>hT2R14,<br>hT2R41,<br>hT2R47,<br>hT2R43, hT2R7,<br>hT2R10,<br>hT2R46,<br>hT2R38,<br>hT2R39,<br>hT2R44,<br>hT2R40, hT2R4 |
|           |   |        |       |   |       | ACE-inhibition                                                      | LSP, LSPA,<br>AG, GK,<br>GG       |                                |                                                                                                                                           |
| AKPSGGPVG | 9 | 768.41 | 10.21 | 1 | 14.93 | ACE-inhibition                                                      | GP, GPV,<br>VG, GG,<br>SG, KP     | P, V, K,<br>KP, GP,<br>GGP, VG | hT2R7, hT2R14,<br>hT2R47,<br>hT2R40,<br>hT2R43, hT2R1,<br>hT2R44,<br>hT2R16,<br>hT2R46,<br>hT2R41,                                        |
|           |   |        |       |   |       | DPP-IV<br>inhibition                                                | GP, KP,<br>GG, PS, PV,<br>VG, GPV |                                |                                                                                                                                           |
|           |   |        |       |   |       | Peptide<br>regulating                                               | GP                                |                                |                                                                                                                                           |

|                |    |         |       |   |       |                                   |                                |                     |                                                                                     |
|----------------|----|---------|-------|---|-------|-----------------------------------|--------------------------------|---------------------|-------------------------------------------------------------------------------------|
|                |    |         |       |   |       | stomach mucosal membrane activity |                                |                     | hT2R38, hT2R10, hT2R39, hT2R4                                                       |
|                |    |         |       |   |       | Antioxidative                     | KP                             |                     |                                                                                     |
|                |    |         |       |   |       | Antithrombotic                    | GP                             |                     |                                                                                     |
| TVAGKG         | 6  | 531.30  | 9.82  | 1 | 13.29 | ACE-inhibition                    | AG, KG, GK                     | V, K, KG, VA        | hT2R1, hT2R16, hT2R14, hT2R41, hT2R39, hT2R10                                       |
|                |    |         |       |   |       | DPP-IV inhibition                 | VA, AG, KG, TV                 |                     |                                                                                     |
| TLGHPSGGGGAALV | 14 | 1192.62 | 7.57  | 0 | 14.87 | ACE-inhibition                    | AA, GA, GH, GG, SG, LG, HP     | P, V, L, LG, LV     | hT2R40, hT2R7, hT2R39, hT2R14, hT2R41, hT2R47, hT2R38, hT2R5, hT2R43, hT2R1, hT2R44 |
|                |    |         |       |   |       | Glucose uptake stimulation        | LV                             |                     |                                                                                     |
|                |    |         |       |   |       | Hypotensive                       | AA                             |                     |                                                                                     |
|                |    |         |       |   |       | DPP-IV inhibition                 | GA, AL, AA, GG, GH, LV, PS, TL |                     |                                                                                     |
|                |    |         |       |   |       | Antioxidative                     | GAA                            |                     |                                                                                     |
| GKGSAPSSGVA    | 11 | 916.46  | 10.16 | 1 | 16.21 | ACE-inhibition                    | AP, KG, GS, GV, GK, SG         | P, V, L, GV, KG, VA | hT2R7, hT2R14, hT2R40, hT2R47, hT2R1, hT2R39, hT2R41, hT2R43, hT2R38, hT2R16,       |
|                |    |         |       |   |       | DPP-IV inhibition                 | VA, AP, GV, KG, PS             |                     |                                                                                     |



|           |   |        |       |   |       |                                                                     |                                   |                    |                                                                                                                                    |
|-----------|---|--------|-------|---|-------|---------------------------------------------------------------------|-----------------------------------|--------------------|------------------------------------------------------------------------------------------------------------------------------------|
|           |   |        |       |   |       |                                                                     |                                   |                    | hT2R44,<br>hT2R46                                                                                                                  |
| SPAGAPG   | 7 | 555.26 | 5.51  | 0 | 11.94 | ACE-inhibition                                                      | AP, GA,<br>AG, PG                 | P, PA,<br>PG       | hT2R1, hT2R14,<br>hT2R16,<br>hT2R46,<br>hT2R43,<br>hT2R10,<br>hT2R41,<br>hT2R39,<br>hT2R47, hT2R7,<br>hT2R44                       |
|           |   |        |       |   |       | Peptide<br>regulating<br>stomach<br>mucosal<br>membrane<br>activity | PG                                |                    |                                                                                                                                    |
|           |   |        |       |   |       | Antithrombotic                                                      | PG                                |                    |                                                                                                                                    |
|           |   |        |       |   |       | DPP-IV<br>inhibition                                                | AP, PA,<br>APG, SP,<br>GA, AG, PG |                    |                                                                                                                                    |
| HPTASAGKG | 9 | 824.41 | 9.94  | 1 | 17.18 | ACE-inhibition                                                      | AG, KG,<br>GK, PT, HP             | P, K, KG           | hT2R7, hT2R14,<br>hT2R47,<br>hT2R40, hT2R1,<br>hT2R43,<br>hT2R41,<br>hT2R16,<br>hT2R38,<br>hT2R39,<br>hT2R44,<br>hT2R46,<br>hT2R10 |
|           |   |        |       |   |       | DPP-IV<br>inhibition                                                | HP, TA,<br>AG, AS,<br>KG, PT      |                    |                                                                                                                                    |
| GKGLSF    | 6 | 607.33 | 10.16 | 1 | 10.50 | ACE-inhibition                                                      | GL, KG,<br>GK, SF, GL             | F, L, K,<br>KG, GL | hT2R14,<br>hT2R16, hT2R1,<br>hT2R38,<br>hT2R46,<br>hT2R43,                                                                         |
|           |   |        |       |   |       | DPP-IV<br>inhibition                                                | KG, SF                            |                    |                                                                                                                                    |

|          |   |        |      |   |       |                               |                       |                 |                                                                                                                                           |
|----------|---|--------|------|---|-------|-------------------------------|-----------------------|-----------------|-------------------------------------------------------------------------------------------------------------------------------------------|
|          |   |        |      |   |       |                               |                       |                 | hT2R47, hT2R7,<br>hT2R39,<br>hT2R10,<br>hT2R44, hT2R4,<br>hT2R40,<br>hT2R41, hT2R9                                                        |
| HPSGGKGG | 8 | 695.33 | 9.94 | 1 | 18.23 | ACE-inhibition                | KG, GK,<br>GG, SG, HP | P, K, KG        | hT2R7, hT2R14,<br>hT2R16, hT2R1,<br>hT2R43,<br>hT2R38,<br>hT2R47,<br>hT2R39,<br>hT2R46,<br>hT2R41,<br>hT2R44,<br>hT2R10,<br>hT2R40, hT2R4 |
|          |   |        |      |   |       | DPP-IV<br>inhibition          | HP, GG,<br>KG, PS     |                 |                                                                                                                                           |
| TKATAS   | 6 | 577.31 | 9.82 | 1 | 12.66 | ACE-inhibition                | KA                    | K               | hT2R1, hT2R14,<br>hT2R41,<br>hT2R16,<br>hT2R39                                                                                            |
|          |   |        |      |   |       | DPP-IV<br>inhibition          | KA, TA,<br>AS, AT, TK |                 |                                                                                                                                           |
| LPLL     | 4 | 454.31 | 5.58 | 0 | 4.29  | ACE-inhibition                | PL, LPL, LP           | P, L, LL,<br>PL | hT2R14,<br>hT2R40, hT2R1,<br>hT2R10,<br>hT2R43,<br>hT2R41,<br>hT2R39, hT2R4,<br>hT2R46,<br>hT2R16,<br>hT2R47,                             |
|          |   |        |      |   |       | Glucose uptake<br>stimulation | LL                    |                 |                                                                                                                                           |
|          |   |        |      |   |       | Antioxidative                 | LPL                   |                 |                                                                                                                                           |
|          |   |        |      |   |       | DPP-IV<br>inhibition          | LL, LPL,<br>LP, PL    |                 |                                                                                                                                           |
|          |   |        |      |   |       | DPP-IV<br>inhibition          | VV, VF                |                 |                                                                                                                                           |

|         |   |        |       |    |       |                      |                       |                           |                                                                                                                                                             |
|---------|---|--------|-------|----|-------|----------------------|-----------------------|---------------------------|-------------------------------------------------------------------------------------------------------------------------------------------------------------|
|         |   |        |       |    |       |                      |                       |                           | hT2R38, hT2R7,<br>hT2R44                                                                                                                                    |
| FLDPAL  | 6 | 674.36 | 3.12  | -1 | 7.97  | DPP-IV<br>inhibition | PA, FL, AL,<br>DP     | P, F, L,<br>FL, LD,<br>PA | hT2R14, hT2R7,<br>hT2R43,<br>hT2R40,<br>hT2R47,<br>hT2R46,<br>hT2R44, hT2R1,<br>hT2R38,<br>hT2R10, hT2R4,<br>hT2R39,<br>hT2R16,<br>hT2R41,<br>hT2R45, hT2R8 |
| GKGLSF  | 6 | 607.33 | 10.16 | 1  | 10.50 | ACE-inhibition       | GL, KG,<br>GK, SF     | F, L, K,<br>GL, KG        | hT2R14,<br>hT2R16, hT2R1,<br>hT2R38,<br>hT2R46,<br>hT2R43,<br>hT2R47, hT2R7,<br>hT2R39,<br>hT2R10,<br>hT2R44, hT2R4,<br>hT2R40,<br>hT2R41, hT2R9            |
|         |   |        |       |    |       | DPP-IV<br>inhibition | GL, KG, SF            |                           |                                                                                                                                                             |
| VTPAGGR | 7 | 656.36 | 11.11 | 1  | 12.44 | ACE-inhibition       | AG, GR,<br>GG, TP     | V, R, P,<br>GR, PA        | hT2R1, hT2R14,<br>hT2R16,<br>hT2R47,<br>hT2R46,<br>hT2R43, hT2R7,<br>hT2R41,<br>hT2R10,                                                                     |
|         |   |        |       |    |       | DPP-IV<br>inhibition | PA, TP, AG,<br>GG, VT |                           |                                                                                                                                                             |

|                |    |         |       |   |       |                                     |                                                     |                                                                       |                                                                                                                                                     |
|----------------|----|---------|-------|---|-------|-------------------------------------|-----------------------------------------------------|-----------------------------------------------------------------------|-----------------------------------------------------------------------------------------------------------------------------------------------------|
|                |    |         |       |   |       |                                     |                                                     |                                                                       | hT2R44,<br>hT2R38,<br>hT2R39,<br>hT2R40, hT2R4                                                                                                      |
| TPPAGGAAR      | 9  | 796.42  | 10.79 | 1 | 14.04 | ACE-inhibition                      | AA, GA,<br>AG, GG,<br>AR, PP, TP                    | R, P, PP,<br>PA                                                       | hT2R7, hT2R14,<br>hT2R47, hT2R1,<br>hT2R43,<br>hT2R16,<br>hT2R40,<br>hT2R46,<br>hT2R44,<br>hT2R41,<br>hT2R38,<br>hT2R10,<br>hT2R39, hT2R4           |
|                |    |         |       |   |       | Antioxidative                       | GAA                                                 |                                                                       |                                                                                                                                                     |
|                |    |         |       |   |       | Hypotensive                         | AA                                                  |                                                                       |                                                                                                                                                     |
|                |    |         |       |   |       | DPP-IV<br>inhibition                | PP, PA, TP,<br>GA, AA,<br>AG, GG                    |                                                                       |                                                                                                                                                     |
|                |    |         |       |   |       | $\alpha$ -Glucosidase<br>inhibition | PP                                                  |                                                                       |                                                                                                                                                     |
| PSPKGGGLG      | 9  | 768.41  | 10.59 | 1 | 14.79 | ACE-inhibition                      | GL, KG,<br>GG, LG                                   | P, L, K,<br>PK, LG,<br>GL,<br>GLG,<br>GGL,<br>GGLG,<br>GGGL,<br>GGGLG | hT2R7, hT2R14,<br>hT2R47,<br>hT2R16,<br>hT2R43, hT2R1,<br>hT2R38,<br>hT2R46,<br>hT2R40,<br>hT2R44,<br>hT2R39,<br>hT2R41,<br>hT2R10, hT2R4,<br>hT2R9 |
|                |    |         |       |   |       | DPP-IV<br>inhibition                | SP, GL, GG,<br>KG, PK, PS                           |                                                                       |                                                                                                                                                     |
| SPHLAGSGGGAALV | 14 | 1192.62 | 7.63  | 0 | 14.43 | ACE-inhibition                      | LA, AA,<br>GA, AG,<br>HL, GS,<br>GG, SG,<br>PH, AGS | P, V, L,<br>LV, LA                                                    | hT2R40, hT2R7,<br>hT2R39,<br>hT2R41,<br>hT2R14, hT2R5,<br>hT2R47,                                                                                   |

|           |   |        |      |   |       |                                             |                                                 |                  |                                                                                                              |
|-----------|---|--------|------|---|-------|---------------------------------------------|-------------------------------------------------|------------------|--------------------------------------------------------------------------------------------------------------|
|           |   |        |      |   |       | Glucose uptake stimulation                  | LV                                              |                  | hT2R38,<br>hT2R43                                                                                            |
|           |   |        |      |   |       | Antioxidative                               | HL, GAA                                         |                  |                                                                                                              |
|           |   |        |      |   |       | Hypotensive                                 | AA                                              |                  |                                                                                                              |
|           |   |        |      |   |       | DPP-IV inhibition                           | LA, SP, GA,<br>HL, AL,<br>AA, AG,<br>GG, LV, PH |                  |                                                                                                              |
| SPGAGPA   | 7 | 555.26 | 5.51 | 0 | 11.94 | ACE-inhibition                              | GPA, GA,<br>AG, PG,<br>AGP, GAGP                | P, GP,<br>PA, PG | hT2R1, hT2R14,<br>hT2R16,<br>hT2R46,<br>hT2R43,<br>hT2R10,<br>hT2R41,<br>hT2R39,<br>hT2R47, hT2R7,<br>hT2R44 |
|           |   |        |      |   |       | Antithrombotic                              | GP, PG                                          |                  |                                                                                                              |
|           |   |        |      |   |       | Peptide regulating stomach mucosal activity | GP, PG                                          |                  |                                                                                                              |
|           |   |        |      |   |       | DPP-IV inhibition                           | GP, PA, SP,<br>GPA, GA,<br>AG, PG               |                  |                                                                                                              |
| HPATTGGKG | 9 | 824.41 | 9.94 | 1 | 17.62 | ACE-inhibition                              | KG, GK,<br>GG, TG, HP                           | P, K, KG,<br>PA  | hT2R40, hT2R7,<br>hT2R39,<br>hT2R14,<br>hT2R41,<br>hT2R38, hT2R5,<br>hT2R47,<br>hT2R43, hT2R1                |
|           |   |        |      |   |       | DPP-IV inhibition                           | AT, GG,<br>KG, TG,<br>TT, HP, PA                |                  |                                                                                                              |
| TKSGVS    | 6 | 577.31 | 9.82 | 1 | 12.56 | ACE-inhibition                              | GV, SG                                          | V, K, GV         | hT2R1, hT2R14,<br>hT2R16,                                                                                    |
|           |   |        |      |   |       | DPP-IV inhibition                           | GV, KS,<br>TK, VS                               |                  |                                                                                                              |

|  |  |  |  |  |  |                      |            |  |                   |
|--|--|--|--|--|--|----------------------|------------|--|-------------------|
|  |  |  |  |  |  | DPP-IV<br>inhibition | PA, LP, AL |  | hT2R41,<br>hT2R39 |
|--|--|--|--|--|--|----------------------|------------|--|-------------------|

Supplementary Table 2. Molecular docking of peptides identified by LC-ESI-MS/MS from germinated chickpea protein hydrolysate present in legumin.

|        | T2R4                          |                                                                                                                                                              | T2R14                         |                                                                                                                                                                                           |
|--------|-------------------------------|--------------------------------------------------------------------------------------------------------------------------------------------------------------|-------------------------------|-------------------------------------------------------------------------------------------------------------------------------------------------------------------------------------------|
|        | Energy of Affinity (kcal/mol) | Amino acid residues                                                                                                                                          | Energy of Affinity (kcal/mol) | Amino acid residues                                                                                                                                                                       |
| VVFW   | -5.3                          | LEU181 [4.19], PHE189 [3.97], SER186 [3.27], SER243 [1.79], TYR250 [5.25], VAL182 [5.44, 5.45]                                                               | -10.5                         | ASN157 [2.25, 2.37], GLU255 [2.35], ILE148 [5.25], ILE262 [4.63, 5.41], PHE175 [3.79], SER169 [1.97], SER250 [2.64], SER254 [2.74], TRP89 [3.65, 3.76]                                    |
| FDLPAL | -5.4                          | LEU181 [4.78], PHE189 [4.88], SER243 [2.03], TYR250 [4.28], VAL178 [5.25], VAL193 [4.99]                                                                     | -9.7                          | ASN157 [2.03, 2.43, 2.95], GLU259 [3.07], ILE148 [4.07], LEU261 [5.02], PHE175 [3.63], PHE243 [3.78], PHE247 [4.81], SER167 [3.01, 3.12], SER169 [2.19], TRP66 [4.14], TRP89 [4.58, 5.22] |
| GEAGR  | -5.9                          | GLN249 [2.78], LEU177 [2.90], LYS262 [2.84], MET89 [3.03], SER176 [2.73], SER180 [2.48, 3.19], SER184 [2.45], THR166 [2.70, 2.81, 3.39], TYR147 [2.86, 2.94] | -8.2                          | ASN157 [2.42, 2.73], GLU255 [2.27], PHE175 [3.61], SER167 [2.84], SER169 [2.24, 2.73], THR86 [2.35], TRP89 [3.90]                                                                         |
